# Supplementary material
Source: publisher site journal article supplement (https://www.dovepress.com/article/486393)
Supplement: Supplementary file 1 [file get_supplementary_file.php]

# Supplemental Digital Contents (SDC)

## SDC 1: Nephrectomy procedure

A left upper abdominal incision of about 15 cm was made along the rectus abdominis muscle, and the layers were gradually entered into the abdomen. The spleen-colon ligament was ligated and cut, and the lateral peritoneum was opened. The transverse colon and descending colon were pushed to the opposite side, and the renal fascia was lifted and cut. The scissors were used to free the anterior, posterior, upper, and lower poles of the kidney. The left kidney was found to be normal in size and shape, with a healthy red colour. The left renal vein was exposed and ligated, followed by ligation and division of the left testicular vein, left adrenal vein, and left lumbar vein. The left renal artery was identified by palpating the pulsation behind the left renal vein, and then dissected. Fine ligation was performed around the small renal arteries, and the ureter was carefully dissected and transacted at the level of the iliac vessels. At this point, the inferior vena cava is completely exposed and only the renal artery remains connected. Sodium heparin (50 mg) and furosemide (10 mg) are administered, and after 2 minutes, the renal artery and vein are disconnected, and the kidney is immediately perfused with cold preservation solution. After the kidneys turned pale, they were refrigerated for future use.

## SDC 2: Brief process for testing for IL-18, TIMP-2 and KIM-1biomarkers

1. Sample Handling

The IL-18 and KIM-1 reagent kits can directly test urine samples. Before conducting the experiment with the TIMP-2 kit, four random samples were selected for a pre-experiment concentration gradient test. It was found that the best experimental results were obtained when the samples were diluted 10 times, so a 10-fold dilution was used for the formal experiment. The diluent used is provided in the reagent kit.

2. ELISA Experimental Steps

Before starting the experiment, all reagents should be equilibrated to room temperature. When preparing reagents or samples, they should be thoroughly mixed and avoid foaming as much as possible.

2.1. Addition of Samples: Set up blank wells, standard wells, and test sample wells separately. Add 100μl of sample diluent to blank wells and add 100μl of standard or test sample to each remaining well. Cover the plate with a film and incubate at 37°C for 90 minutes (refer to relevant content in Excel table for sample addition order and corresponding numbering).

2.2. Discard liquid, tap dry, add 100μl of biotinylated antibody working solution to each well (prepared within 15 minutes before use), cover the plate with a film, and incubate at 37°C for 1 hour.

2.3. Discard liquid from wells, tap dry, wash the plate three times by immersing it in approximately350 μl/well washing buffer for about 1-2 minutes each time. Tap dry on absorbent paper after washing to remove residual liquid from wells.

2.4. Add 100 μl of enzyme conjugate working solution per well (prepared within 15 minutes before use), cover the plate with a film, and incubate at 37°C for 30minutes.

2.5. Discard liquid from wells, tap dry, wash the plate five times, using the same method as step2.3

2.6. Add 90μl of substrate solution to each well, cover the plate with a film and incubate at 37°C in the dark for 15 minutes.

2.7. Add 50μl of stop solution to each well to terminate the reaction. At this point, the blue colour will turn yellow.

2.8. Immediately measure the optical density (OD value) of each well at a wavelength of 450nm using an ELISA reader. The instrument should be powered on in advance, preheated, and set up with the appropriate detection program.

2.9. After completing the experiment, any unused reagents should be stored according to instructions and returned to refrigeration storage.

## SDC 3: PASS 15 sample calculation

Tests for Two Means in a Repeated Measures Design

Numeric Results

Two-Sided Test. Null Hypothesis: D = 0. Alternative Hypothesis: D ≠ 0.

Covariance Type = Compound Symmetry

---

Target Actual

Power Power N1 N2 N M D1 Sigma Rho Alpha

0.90 0.91035 27 27 54 4 60.000 90.000 0.400 0.050

0.90 0.91035 12 12 24 4 90.000 90.000 0.400 0.050

0.90 0.99958 1 1 2 4 500.000 90.000 0.400 0.050

---

References

Brown, H. and Prescott, R., 2006. Applied Mixed Models in Medicine. 2nd ed. John Wiley & Sons Ltd. Chichester,

West Sussex, England. Chapter 6.

Liu, H. and Wu, T., 2005. 'Sample Size Calculation and Power Analysis of Time-Averaged Difference.' Journal of

Modern Applied Statistical Methods, Vol. 4, No. 2, pages 434-445.

Diggle, P.J., Liang, K.Y., and Zager, S.L., 1994. Analysis of Longitudinal Data. Oxford University Press. New

York, New York. Chapter 2.

Report Definitions

Target Power is the desired power value (or values) entered in the procedure. Power is the probability of rejecting a false null hypothesis.

Actual Power is the power obtained in this scenario. Because N1 and N2 are discrete, this value is often (slightly) larger than the target power.

N1 and N2 are the number of items sampled from each population.

N is the total sample size, N1 + N2.

M is the number of time points (repeated measurements) at which each subject is observed.

D1 is the difference between the means of groups 1 and 2 under the alternative hypothesis.

Sigma is the standard deviation of a single observation. It is the same for both groups. Rho is the correlation between observations on the same subject.

Alpha is the probability of rejecting a true null hypothesis.

Summary Statements

Group sample sizes of 27 and 27 achieve 91% power to detect a difference of 60.000 in a design with 4 repeated measurements having a Compound Symmetry covariance structure when the standard deviation is 90.000, the correlation between observations on the same subject is 0.400, and the alpha level is 0.050.

## Table S1: Definition and description of variables in the study

| Variables | Definition | Time point |
| --- | --- | --- |
| Sex | Individuals are classified as female or male based on a series of biological features and the information on their identification card. | Preoperative |
| Age | Participants' actual age at the time of study enrollment is calculated in complete years. | Preoperative |
| High | Vertical distance from the base of the feet to the top of the head, measured in a standing position with the feet together using a calibrated stadiometer, and recorded in centimeters (cm). | Preoperative |
| Weight | Total mass of the participant, measured using a calibrated scale while the participant is dressed in light clothing and without shoes, and recorded in kilograms (kg). | Preoperative |
| BMI | Body Mass Index (BMI) is calculated from an individual’s weight and height, using the formula: BMI = Weight (kg) / Height (m)² | Preoperative |
| ASA | ASA (American Society of Anesthesiologists) Physical Status Classification System is used to assess a patient’s preoperative health condition and categorize them into one of the following classes: ASA I (healthy patient), ASA II (mild systemic disease), ASA III (severe systemic disease), ASA IV (severe disease that is a constant threat to life), ASA V (moribund patient), or ASA VI (brain-dead patient). | Preoperative |
| Complications | Based on the participants’ preoperative examination reports and medical history inquiries, the presence of hypertension, diabetes, heart disease, or cerebrovascular disease was assessed. The presence of any of these conditions was defined as the presence of complications. | Preoperative |
| Propofol | Propofol: Emulsion, manufactured by Xi’an Libang Pharmaceutical Co., Ltd., Chinese Drug approval number: H20123318. Use the Marsh pharmacokinetic model for target-controlled infusion anesthesia and record the control infusion concentration used during anesthesia maintenance, in units of ug-ml-1. | Intraoperative |
| Sevoflurane | Sevoflurane: Liquid, produced by Shanghai Hengrui Pharmaceutical Co., Ltd., Chinese Drug approval number: H20070172. Record the concentration of sevoflurane inhaled during maintenance of anesthesia, in percentage. | Intraoperative |
| phenylephrine | Phenylephrine：produced by Shanghai Harvest Pharmaceutical Co., Ltd. Chinese Drug approval number: H31021175. Record the total dosage of drugs used during general anesthesia, in micrograms. | Intraoperative |
| Sufentanil | Sufentanil: produced by Yichang Renfu Pharmaceutical Co., Ltd., Chinese Drug approval number: H20054171. T Record the total dosage of drugs used during general anesthesia, in micrograms. | Intraoperative |
| Remifentanil | Remifentanil: produced by Yichang Renfu Pharmaceutical Co., Ltd., Chinese Drug approval number: H20030197. Apply the Minto pharmacokinetic model for target-controlled infusion anesthesia and record the total drug dose used during the surgical procedure in micrograms. | Intraoperative |
| Cisatracurium | Cisatracurium: produced by Shanghai Hengrui Pharmaceutical Co., Ltd., Chinese Drug approval number: H20060869. Record the total dosage of drugs used during general anesthesia, in milligrams. | Intraoperative |
| Oxycodone | Oxycodone：produced by Rafa Laboratories Ltd. Record the total dosage of drugs used during general anesthesia, in milligrams. | Intraoperative |
| Infusion | Record the total volume of intravenous fluids administered during the entire surgery, in milliliters. | Intraoperative |
| Urine output | Record the total urine output of the participants throughout the surgery, in milliliters. | Intraoperative |
| MAP, SVR, SVV, CO | During the surgery, invasive arterial pressure and the Masimo LiDCO™ hemodynamic monitoring system (Masimo Corporation, California, USA) were used. Hemodynamic monitoring was conducted. Hemodynamic parameters such as mean arterial pressure (MAP), systemic vascular resistance (SVR), stroke volume variability (SVV), and cardiac output (CO) were recorded before the start of the surgery (T0) and every 30 minutes after the surgery (T1-T6). | Intraoperative |
| PONV | Postoperative Nausea and Vomiting (PONV) is defined as the occurrence of nausea and/or vomiting at any time within 48 hours post-surgery. If nausea or vomiting is observed during this period, it is considered a positive case of PONV. | Postoperative |
| PreHb, PostHb, DeHb | Venous blood was collected from participants before and after surgery to measure the hemoglobin content in the venous blood, recorded as PreHb and PostHb respectively. The decrease in hemoglobin was calculated and recorded as DeHb, with units in g/L. he testing was conducted in the biochemical laboratory of the research hospital. |  |
| KIM-1, TIMP-2, IL-18 | Urine samples collected pre-surgery, and on days 1, 2, and 6 post-surgery, were analyzed using the Enzyme-Linked Immunosorbent Assay (ELISA; DL-TIMP2-Hu, DL-Kim1-Hu, and DL-IL-18-Hu, DL-develop Systems, Wuxi, China) to measure the concentrations of TIMP-2, KIM-1, and IL-18. | Pre-surgery, and on days 1, 2, and 6 post-surgery |
| Cys-C, eGFR, UA | Venous blood was collected from participants postoperatively and on days 1, 2, and 6 after surgery. The levels of Cys-C(cystatin C), creatinine, and UA(uric acid) in the venous blood were measured, and the GFR was estimated using the Cockcroft-Gault equation. The testing was conducted in the biochemical laboratory of the research hospital. | Pre-surgery, and on days 1, 2, and 6 post-surgery |
| Urine output | Record the urine output of participants on the day before surgery (0Day), the first day after surgery (1Day), and the second day (2Day). Present it in milliliters per hour per kilogram of body weight（ml/h/kg）. | the day before surgery, and on days 1, 2, post-surgery |

## Table S2: Donors’ clinical follow-up outcomes adjust for Sufentanil.

|  | P group (n=34) | S group (n=28) | Mean between-group difference in change (95% CI) |
| --- | --- | --- | --- |
| Mean change (95% CI) | Mean change (95% CI) |
| Primary outcome |  |  |  |
| KIM-1 (pg·ml-1) | 0.45 (95% CI 0.23 to 0.67) | 0.22 (95% CI 0.03 to 0.47) | -0.23 (95% CI -0.58 to 0.12) |
| Secondary outcome |  |  |  |
| TIMP-2 (ng·ml-1) | 14.15 (95% CI 10.02 to 18.27) | 13.31 (95% CI 8.72 to 17.90) | -0.84 (95% CI -7.34 to 5.67) |
| IL-18 (pg·ml-1) | 140.48 (95% CI 70.68 to 210.27) | 222.09 (95% CI 144.34 to 299.84) | 81.61 (95% CI -28.50 to 191.72) |
| MAP (mmHg) | 1.06 (95% CI -3.63 to 5.73) | 0.11 (95% CI -5.10 to 5.33) | -0.94 (95% CI -8.33 to 6.44) |
| SVR (dyn·s·cm-5) | 255.73 (95% CI 139.58 to 371.89) | 212.38 (95% CI 96.23 to 328.53) | -43.35 (95% CI -208.67 to 121.97) |
| SVV (%) | 0.33 (95% CI -0.89 to 1.55) | 0.82 (95% CI -0.14 to 1.78) | 0.50 (95% CI -1.12 to 2.12) |
| CO (L·min-1) | -0.35 (95% CI -0.73 to -0.03) | -0.43 (95% CI -0.73 to -0.13) | -0.08 (95% CI -0.58 to 0.43) |
| Cys-C (mg·L-1) | 0.28 (95% CI 0.23 to 0.33) | 0.02 (95% CI -0.06 to 0.09) | 0.02 (95% CI -0.06 to 0.09) |
| eGFR (ml·min-1 (1.73m)-2) | -35.11 (95% CI -39.91- -30.32) | -36.84 (95% CI -42.18- -31.49) | -1.72 (95% CI -9.29- 5.85) |
| UA (umol L-1) | -24.81 (95% CI -40.71 to -8.91) | -30.57 (95% CI -48.28 to -12.87) | -5.77 (95% CI -30.84 to 19.31) |
| Urine output (ml·kg-1·h-1) | -3.68 (95% CI -4.30 to -3.06) | -4.21 (95% CI -4.90 to -3.52) | -0.53 (95% CI -1.51 to 0.44) |

*Haemodynamic indices during anaesthesia, presented as mean (95% conﬁdence intervals). CO, cardiac output; eGFR, estimated glomerular ﬁltration rate measured with Cockcroft-Gault equation; IL-18, interleukin-18; KIM-1, kidney injury marker-1; MAP, mean arterial pressure; TIMP-2, tissue inhibitor of metalloproteinase-2; UA, uric acid; SVR, systemic vascular resistance; SVV, stroke volume variation. Regression analysis was conducted using a repeated-measures mixed-effects linear regression model.*
